# Supplementary material for: Technical note: Gas-phase nitrate radical generation via irradiation of aerated ceric ammonium nitrate mixtures
Source: Copernicus journal article supplement (doi:10.5194/acp-23-13869-2023), 2023-11-07
Supplement: Supplementary file 1 [file acp-23-13869-2023-supplement.zip]

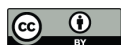

*Supplement of*

## **Technical note: Gas-phase nitrate radical generation via irradiation of aerated ceric ammonium nitrate mixtures**

**Andrew T. Lambe et al.**

*Correspondence to:* Andrew T. Lambe (lambe@aerodyne.com)

- acp-23-13869-2023-supplement-title-page.pdf
- KinSim\_CeNO3\_mechanism\_v1.itx
- Lambe\_ACP\_ceriumNO3\_v3\_Supplement.pdf

The copyright of individual parts of the supplement might differ from the article licence.
