# Supplementary material for: Technical note: Gas-phase nitrate radical generation via irradiation of aerated ceric ammonium nitrate mixtures
Source: Copernicus journal article supplement (doi:10.5194/acp-23-13869-2023), 2023-11-07
Supplement: Supplementary file 2 [file acp-23-13869-2023-supplement.zip]

# Supplement to: Technical note: Gas-phase nitrate radical generation via irradiation of aerated ceric ammonium nitrate mixtures

Andrew T. Lambe<sup>1</sup>, Bin Bai<sup>2</sup>, Masayuki Takeuchi<sup>3</sup>, Nicole Orwat<sup>4</sup>, Paul M. Zimmerman<sup>4</sup>, Mitchell W. Alton<sup>1</sup>, Nga L. Ng<sup>2,3,5</sup>, Andrew Freedman<sup>1</sup>, Megan S. Claflin<sup>1</sup>, Drew R. Gentner<sup>6,7</sup>, Douglas R. Worsnop<sup>1</sup>, and Pengfei Liu<sup>2</sup>

<sup>1</sup>Aerodyne Research, Inc., Billerica, MA, USA

<sup>2</sup>School of Earth and Atmospheric Sciences, Georgia Institute of Technology, Atlanta, GA, USA

<sup>3</sup>School of Civil and Environmental Engineering, Georgia Institute of Technology, Atlanta, GA, USA

<sup>4</sup>Department of Chemistry, University of Michigan, Ann Arbor, MI, USA

<sup>5</sup>School of Chemical and Biomolecular Engineering, Georgia Institute of Technology, Atlanta, GA, USA

<sup>6</sup>Department of Chemical and Environmental Engineering, Yale University, New Haven, CT, USA

<sup>7</sup>School of the Environment, Yale University, New Haven, CT, USA

**Correspondence:** Andrew T. Lambe (lambe@aerodyne.com)

## S1 Theoretical analysis of the gas-phase $\text{NO}_3 + \text{NO}_3 \rightarrow \text{N}_2\text{O}_6$ reaction

To further explore the plausibility of  $\text{N}_2\text{O}_6$  formation in this system, we conducted a theoretical investigation of the gas-phase  $\text{NO}_3 + \text{NO}_3 \rightarrow \text{N}_2\text{O}_6$  reaction at  $T = 298$  K and  $p = 1$  atm. Quantum chemical calculations were performed using the Q-Chem 5.2 software package (Epifanovsky et al., 2021), and molecular geometries were obtained using the B3LYP density functional (Becke, 1993) and the 6-31G\* basis set (Hariharan and Pople, 1973). All stationary points were refined by single point calculations applying the B3LYP density functional and the cc-pVTZ basis set (Dunning, 1989) as well as CCSD(T) (Jeziorski and Monkhorst, 1981) and the cc-pVTZ basis set. For  $\text{NO}_3 + \text{NO}_3 \rightarrow \text{N}_2\text{O}_6$ , the calculated enthalpy of reaction ( $\Delta H_{\text{rxn}}$ ) was  $-35.8$  kcal mol<sup>-1</sup> using the CCSD(T) method, and  $-21.9$  kcal mol<sup>-1</sup> using the B3LYP method. By comparison, we calculated  $\Delta H_{\text{rxn}}$  values of  $-26.5$  (CCSD(T)) and  $-18.1$  (B3LYP) kcal mol<sup>-1</sup> for the  $\text{NO}_3 + \text{NO}_2 \rightarrow \text{N}_2\text{O}_5$  reaction; the corresponding energy change ( $\Delta E_{\text{rxn}}$ ) values agreed within 5% of previously obtained experimental and computational  $\Delta E_{\text{rxn}}$  values for this reaction (Jitariu and Hirst, 2000; Glendening and Halpern, 2007). Thus, regardless of the quantum chemical method that was used,  $\text{NO}_3 + \text{NO}_3 \rightarrow \text{N}_2\text{O}_6$  appears to be an exothermic reaction, even more so than  $\text{NO}_3 + \text{NO}_2 \rightarrow \text{N}_2\text{O}_5$ . While the reverse reaction  $\text{N}_2\text{O}_6 \rightarrow 2 \text{NO}_3$  is possible (although endothermic, as is  $\text{N}_2\text{O}_5 \rightarrow \text{NO}_2 + \text{NO}_3$ ) our analysis suggests that the thermodynamically favored reaction pathway is  $\text{N}_2\text{O}_6 \rightarrow \text{N}_2\text{O}_4 + \text{O}_2$ , which had  $\Delta H_{\text{rxn}}$  values ranging from  $-7.02$  (CCSD(T)) to  $-6.15$  (B3LYP) kcal mol<sup>-1</sup>. By contrast, the reaction  $\text{N}_2\text{O}_6 \rightarrow 2 \text{NO}_2 + \text{O}_2$  had  $\Delta H_{\text{rxn}} = 5.28$  (CCSD(T)) and  $5.58$  (B3LYP) kcal mol<sup>-1</sup>; however, because  $\text{N}_2\text{O}_4 \rightarrow 2 \text{NO}_2$  is fast (Poskrebsyshev et al., 2001; Atkinson et al., 2004), the overall reaction  $\text{N}_2\text{O}_6 \rightarrow 2 \text{NO}_2 + \text{O}_2$  is the favored  $\text{N}_2\text{O}_6$  removal pathway in the gas phase, and in solution may occur in addition to or instead of Reaction R4.

## S2 Discussion of additional $\text{I}^-$ CIMS signals

### 20 S2.1 $\text{IO}_x^-$ , $\text{NO}_2^-$ , $\text{NO}_3^-$ , $\text{IHNO}_3^-$ , $\text{HNO}_3\text{NO}_3^-$ , and $\text{IN}_2\text{O}_7^-$

Figure S5 shows time series of  $\text{I}^-$ ,  $\text{IH}_2\text{O}^-$ ,  $\text{IO}^-$ ,  $\text{IO}_2^-$ ,  $\text{NO}_2^-$ ,  $\text{NO}_3^-$ ,  $\text{IHNO}_3^-$ , and  $\text{HNO}_3\text{NO}_3^-$  obtained with the CIMS following irradiation of a mixture of 0.5 M CAN and 1.0 M  $\text{NaNO}_3$ . Signals of  $\text{I}^-$ ,  $\text{IH}_2\text{O}^-$  and  $\text{IHNO}_3^-$  decreased following irradiation of the CAN/ $\text{NaNO}_3$  mixture, whereas  $\text{IO}^-$ ,  $\text{IO}_2^-$ ,  $\text{NO}_2^-$ ,  $\text{NO}_3^-$ , and  $\text{HNO}_3\text{NO}_3^-$  signals increased. One potential source of  $\text{IO}_x^-$  is  $\text{I}^- + \text{O}_3$  reactions in the CIMS ion-molecule reactor (IMR); if this reaction was the sole source of  $\text{IO}_x^-$  here, we estimate an upper limit  $\text{O}_3$  mixing ratio of approximately 15 ppbv present in the IMR (Dörich et al., 2021).  $\text{NO}_2^-$  is generated following the reaction of  $\text{I}^-$  and/or  $\text{IO}_x^-$  with  $\text{HNO}_2$  (Abida and Osthoff, 2011), and  $\text{NO}_3^-$  is generated from the reaction of  $\text{I}^-$  and/or  $\text{IO}_x^-$  with multiple nitrogen oxides, including  $\text{NO}_3$ ,  $\text{HNO}_3$ ,  $\text{HNO}_4$ , and  $\text{N}_2\text{O}_5$  (Huey et al., 1995; Veres et al., 2015; Dörich et al., 2021). Figure S5 additionally shows a time series of  $\text{IN}_2\text{O}_7^-$ , and Figures S6, S7, and S8 shows high-resolution CIMS spectra at  $m/Q = 235$ , 251, and 267. Given  $\text{IN}_2\text{O}_7^-:\text{IN}_2\text{O}_5^- \approx 10^{-3}$  coupled with similar  $\text{IN}_2\text{O}_5^-$  and  $\text{IN}_2\text{O}_7^-$  temporal profiles (Fig. S5), we hypothesize that  $\text{N}_2\text{O}_5 + \text{IO}_x^-$  reactions in the IMR were the primary source of  $\text{IN}_2\text{O}_7^-$ .

### S2.2 $\text{IN}_2\text{O}_4^-$

$\text{IN}_2\text{O}_4^-$  was not detected with the CIMS following irradiation of aqueous  $\text{Ce}^{(\text{IV})}$ , presumably because its hydrolysis rate was too fast (Park and Lee, 1988). In an attempt to decrease the hydrolysis rate, separate experiments were conducted in which the effluent of 40 g of irradiated solid CAN was sampled with the CIMS. At the sample sizes that were used, the solid CAN contained enough solvated  $\text{HNO}_3$  and/or  $\text{H}_2\text{O}$  that its irradiation provided sufficient production of nitrogen oxides for CIMS detection. As shown in Figures S9, S10 and S11, CIMS  $\text{NO}_2^-$ ,  $\text{IN}_2\text{O}_4^-$ ,  $\text{I}(\text{HNO}_2)_n^-$ , and  $(\text{HNO}_2)_n\text{NO}_3^-$  signals were significantly higher following irradiation at  $\lambda = 254$  nm than at the other wavelengths, and Fig. S12 confirms that  $\text{IN}_2\text{O}_4^-$  was the dominant ion signal at  $m/Q = 219$ . Taken together, these observations support our hypothesis that  $\text{HNO}_2$  was generated following fast  $\text{N}_2\text{O}_4$  hydrolysis in aqueous solution.

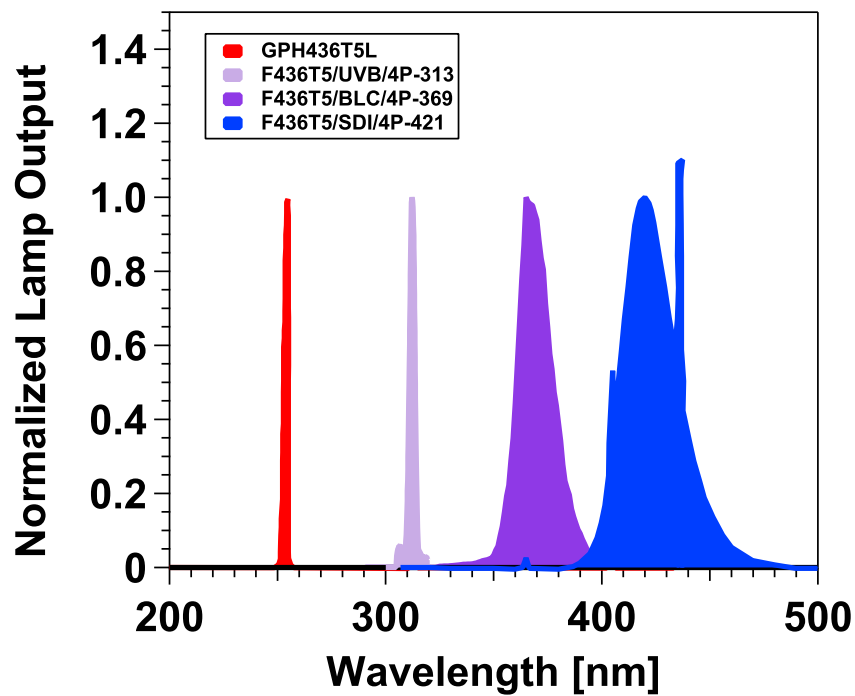

**Figure S1.** Normalized emission spectra for low-pressure GPH436T5L/4P, F436T5/UVB/4P-313, F436T5/BLC/4P-369, and F436T5/SDI/4P-421 mercury lamps used in this study. Spectra are provided by the manufacturer (GPH436T5L/4P: Light Sources Inc.; all others: LCD Lighting, Inc.)

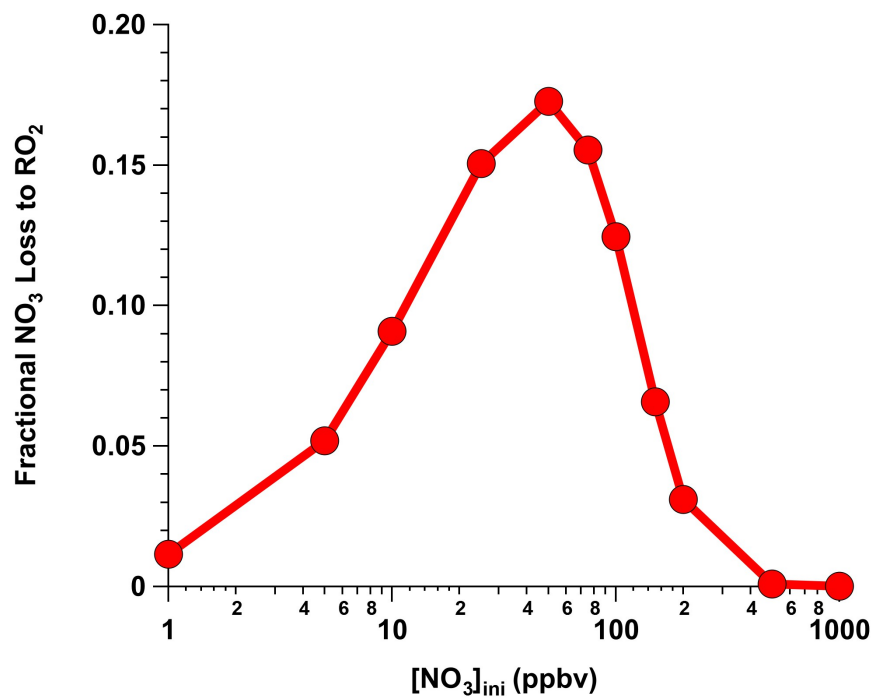

**Figure S2.** Fractional  $\text{NO}_3$  consumption by  $\text{RO}_2$  generated from  $\text{VOC} + \text{NO}_3$  reactions during characterization studies described in Sect. 3.1.

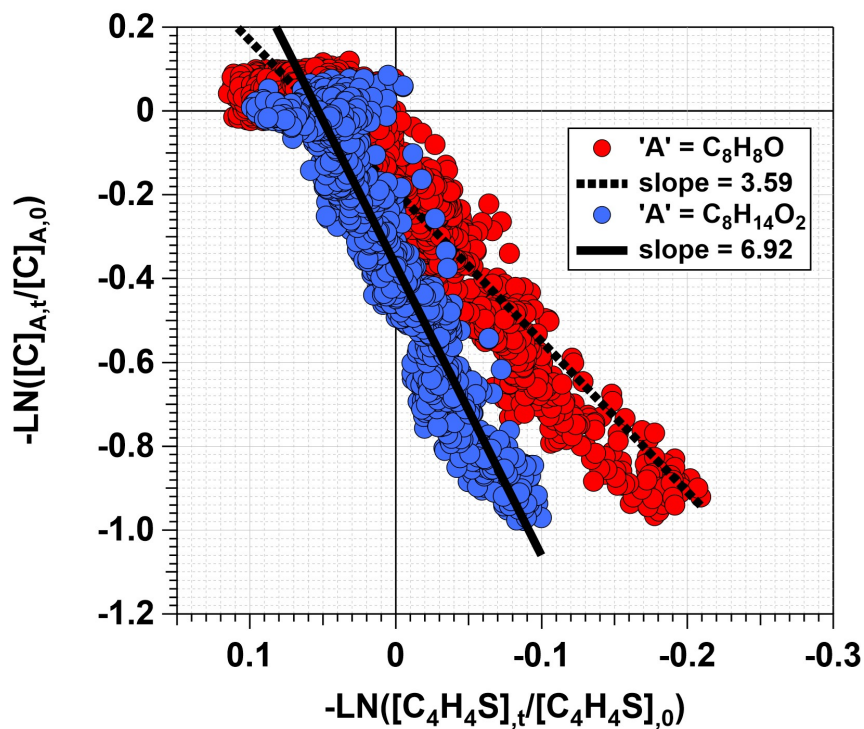

**Figure S3.** Relative rate coefficients obtained from Vocus measurements of acetonitrile ( $C_2H_3N$ ), thiophene ( $C_4H_4S$ ), 2,3-dibenzofuran ( $C_8H_8O$ ), and cis-3-hexynyl-acetate ( $C_8H_{14}O_2$ ) tracers used in characterization studies described in Sect. 3.1. Here, concentrations of  $C_4H_4S$ ,  $C_8H_8O$ , and  $C_8H_{14}O_2$  were first normalized to the  $C_2H_3N$  concentration to correct for changes in the syringe pump output over time and then normalized to the VOC concentration prior to  $NO_3$  exposure. Literature relative rate coefficients obtained from kinetic data published by Atkinson (1991) and Atkinson et al. (1995).

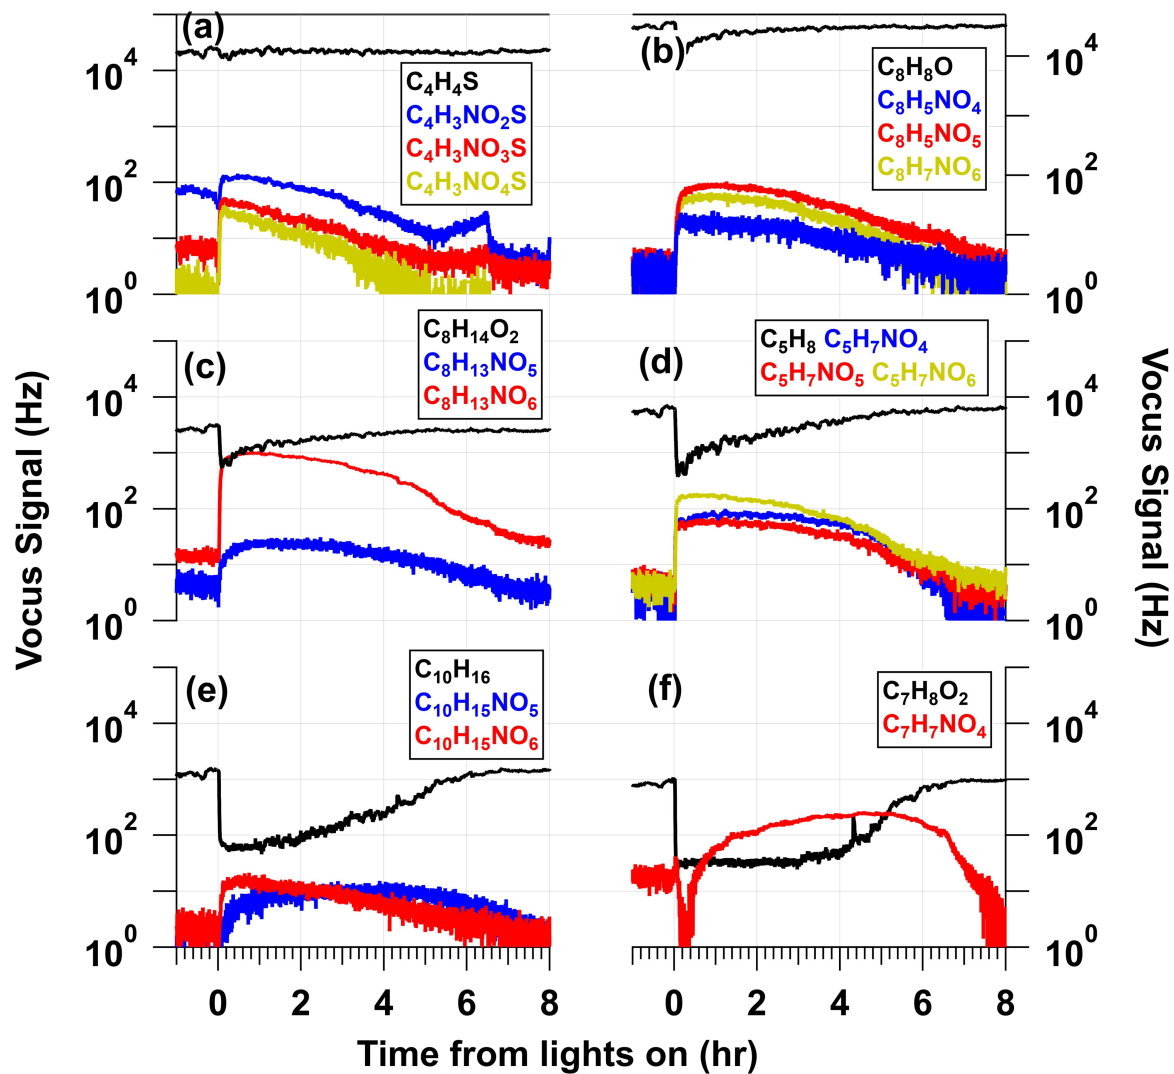

**Figure S4.** Time series of Vocus PTR ions measured following irradiation of a mixture containing 0.5 M CAN and 6.0 M HNO<sub>3</sub> mixture: (a) thiophene (C<sub>4</sub>H<sub>4</sub>S) and nitrothiophenes (C<sub>4</sub>H<sub>3</sub>NO<sub>2-4</sub>S), (b) 2,3-dibenzofuran (C<sub>8</sub>H<sub>8</sub>O) and C<sub>8</sub>H<sub>5,7</sub>NO<sub>4-6</sub>, (c) cis-3-hexynyl-acetate (C<sub>8</sub>H<sub>14</sub>O<sub>2</sub>) and C<sub>8</sub>H<sub>13</sub>NO<sub>5-6</sub>, (d) isoprene C<sub>5</sub>H<sub>8</sub> and C<sub>5</sub>H<sub>7</sub>NO<sub>4-6</sub>, (e) α-pinene (C<sub>10</sub>H<sub>16</sub>) and C<sub>10</sub>H<sub>15</sub>NO<sub>5,6</sub>, and (f) guaiacol C<sub>7</sub>H<sub>8</sub>O<sub>2</sub> and nitroguaiacol (C<sub>7</sub>H<sub>7</sub>NO<sub>4</sub>).

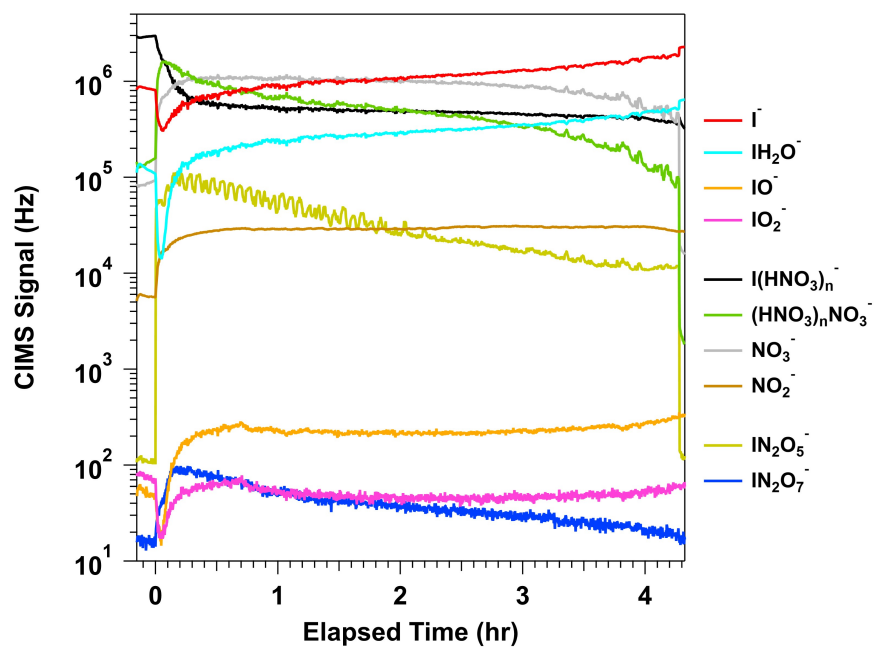

**Figure S5.** HR-ToF-CIMS time series of  $\text{I}^-$ ,  $\text{IH}_2\text{O}^-$ ,  $\text{IO}^-$ ,  $\text{IO}_2^-$ ,  $\text{NO}_2^-$ ,  $\text{NO}_3^-$ ,  $\text{I}(\text{HNO}_3)_n^-$ , and  $\text{HNO}_3(\text{HNO}_3)_n^-$ ,  $\text{IN}_2\text{O}_5^-$ , and  $\text{IN}_2\text{O}_7^-$  signals detected following irradiation of a mixture containing 0.5 M CAN and 1.0 M  $\text{NaNO}_3$  (see Fig. 7).

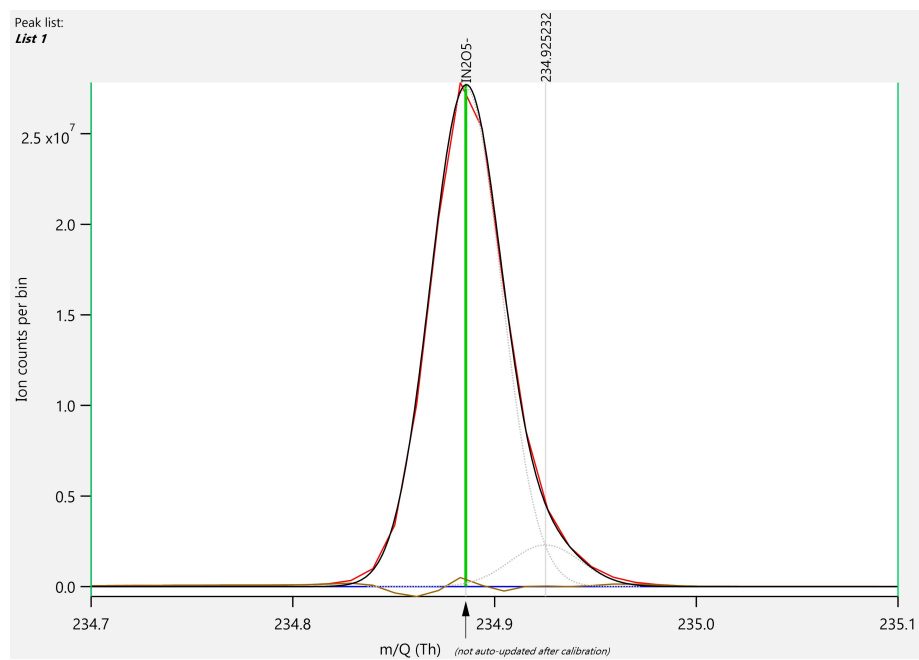

**Figure S6.** HR-ToF-CIMS spectrum of  $m/Q=235$  obtained following irradiation of CAN/HNO<sub>3</sub> mixtures.



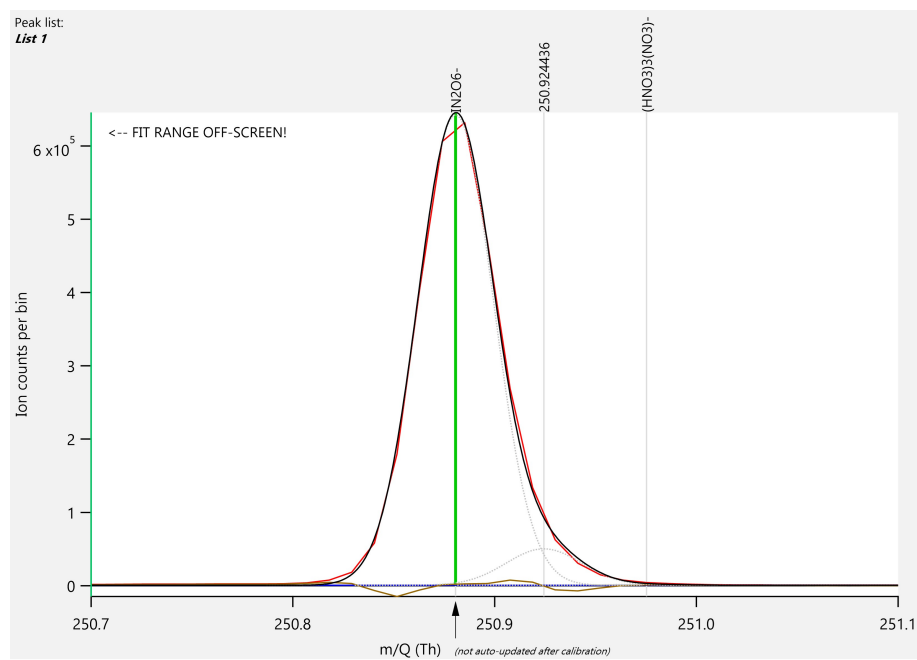

**Figure S7.** HR-ToF-CIMS spectrum of  $m/Q=251$  obtained following irradiation of CAN/HNO<sub>3</sub> mixtures.

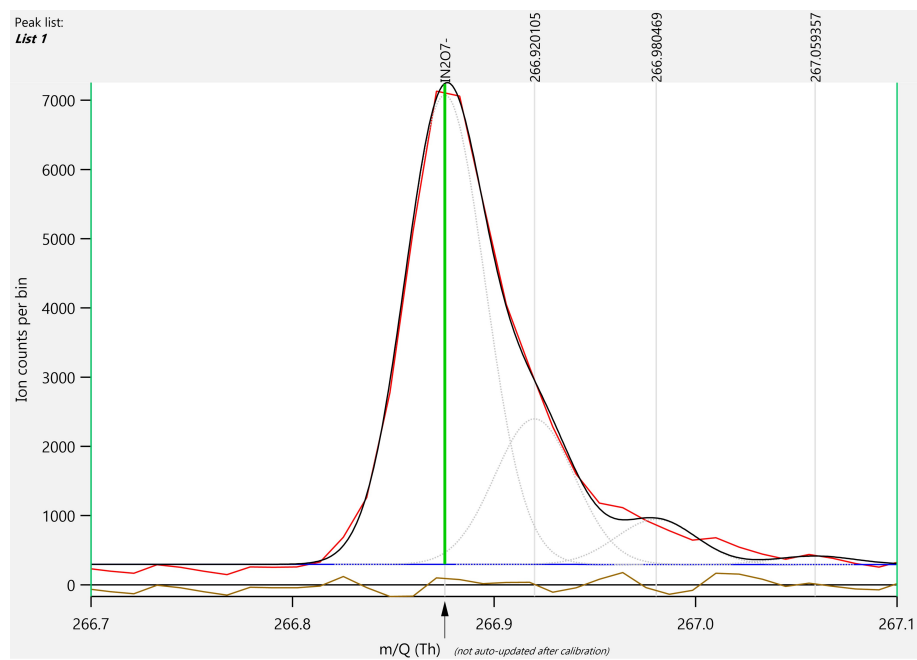

**Figure S8.** HR-ToF-CIMS spectrum of  $m/Q=267$  obtained following irradiation of CAN/HNO<sub>3</sub> mixtures.

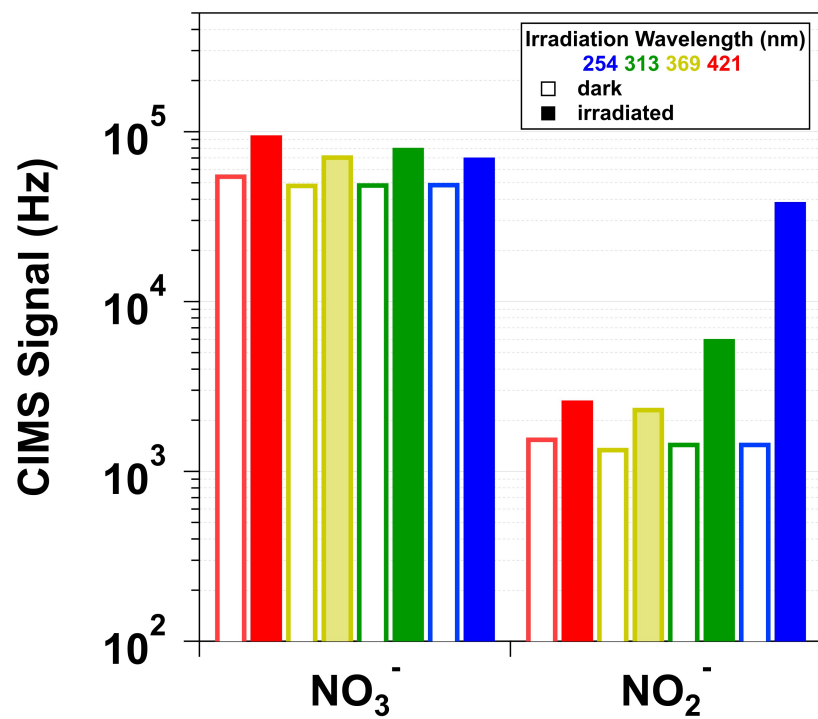

**Figure S9.** HR-ToF-CIMS NO<sub>2</sub><sup>-</sup> and NO<sub>3</sub><sup>-</sup> signals obtained during sampling of dark and irradiated neat CAN samples.

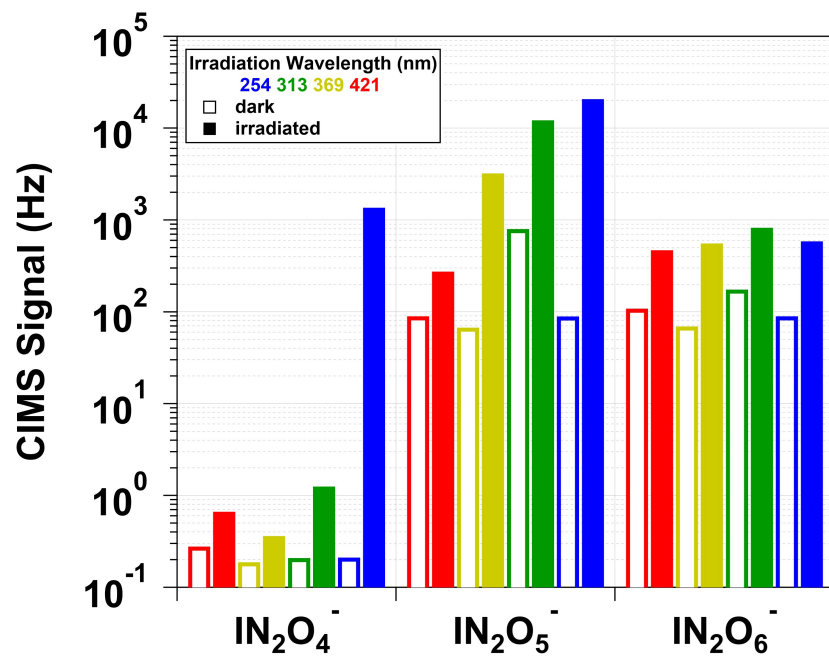

**Figure S10.** HR-ToF-CIMS  $\text{IN}_2\text{O}_4^-$ ,  $\text{IN}_2\text{O}_5^-$ , and  $\text{IN}_2\text{O}_6^-$  signals obtained during sampling of dark and irradiated neat CAN samples.

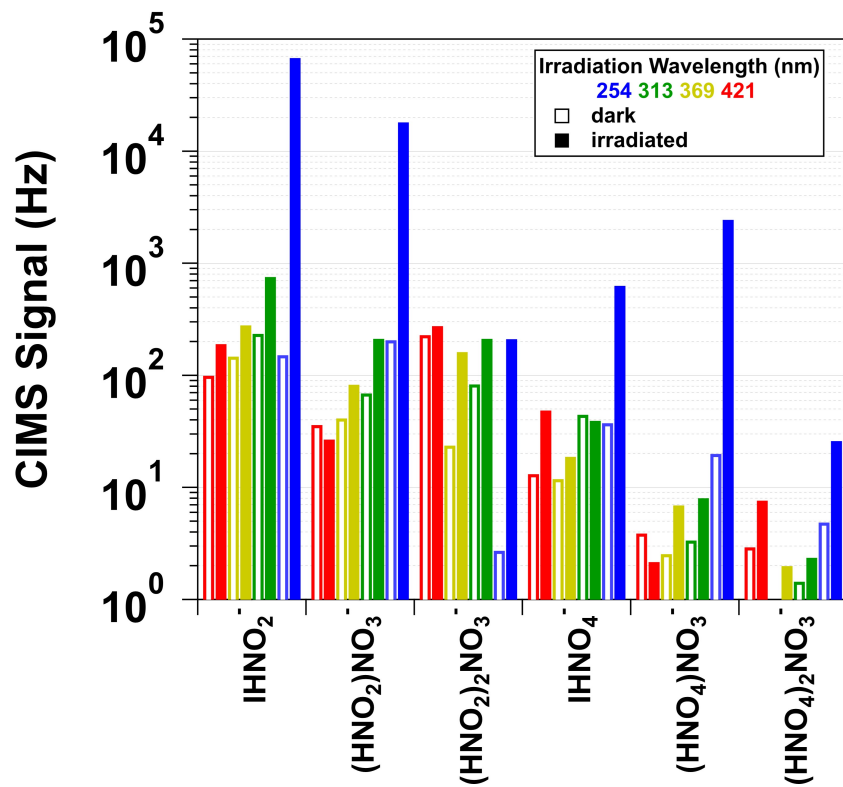

**Figure S11.** HR-ToF-CIMS  $\text{I(HNO}_2\text{)}^-$ ,  $(\text{HNO}_2)_n\text{NO}_3^-$ ,  $\text{I(HNO}_4\text{)}^-$ , and  $(\text{HNO}_4)_n\text{NO}_3^-$  signals obtained during sampling of dark and irradiated neat CAN samples.

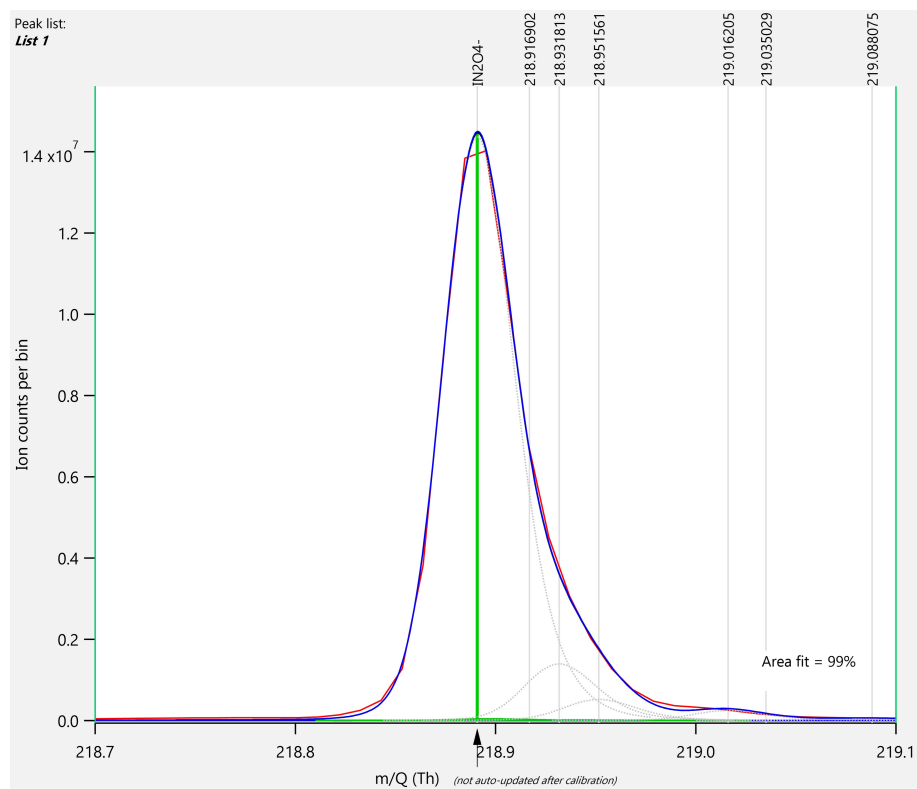

**Figure S12.** HR-ToF-CIMS spectrum of  $m/Q=219$  obtained following irradiation of neat CAN samples.

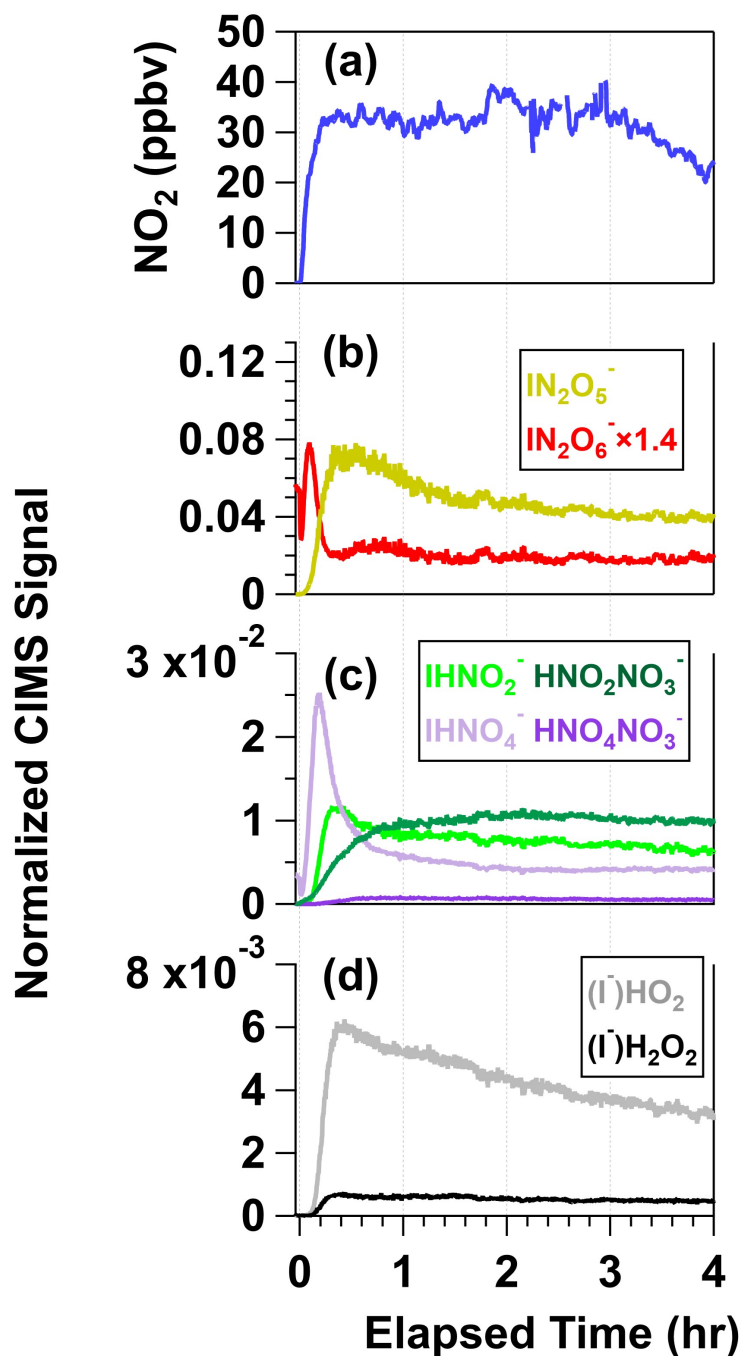

**Figure S13.** Time series of (a)  $\text{NO}_2$ , (b)  $\text{N}_2\text{O}_5$  and  $\text{N}_2\text{O}_6$ , (c)  $\text{HNO}_2$  and  $\text{HNO}_4$ , and (d)  $\text{HO}_2$  and  $\text{H}_2\text{O}_2$  measured with  $\text{NO}_x$  analyzer and HR-ToF-CIMS during irradiation of a mixture containing 0.5 M CAN and 3.0 M  $\text{HNO}_3$ .  $\text{N}_2\text{O}_5$ ,  $\text{N}_2\text{O}_6$ ,  $\text{HO}_2$  and  $\text{H}_2\text{O}_2$  were detected as  $\text{I}^-$  adducts, and  $\text{HNO}_2$  and  $\text{HNO}_4$  were detected as both  $\text{I}^-$  and  $\text{NO}_3^-$  adducts.

**Table S1.** VOC tracers used in CAN/HNO<sub>3</sub> and CAN/NaNO<sub>3</sub> irradiation studies. Bimolecular rate coefficients for reaction with NO<sub>3</sub> are given in units of cm<sup>3</sup> molecule<sup>-1</sup> s<sup>-1</sup>.

| Compound                | Formula                                       | Structure                                                                           | Mixing Ratio (ppb) | k <sub>NO<sub>3</sub></sub> | References               |
|-------------------------|-----------------------------------------------|-------------------------------------------------------------------------------------|--------------------|-----------------------------|--------------------------|
| Acetonitrile            | C <sub>2</sub> H <sub>3</sub> N               | 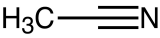   | 517                | $<3.01 \times 10^{-19}$     | Cantrell et al. (1987)   |
| Butanal                 | C <sub>4</sub> H <sub>8</sub> O               |    | 42                 | $1.22 \times 10^{-14}$      | D'Anna et al. (2001)     |
| Thiophene               | C <sub>4</sub> H <sub>4</sub> S               |    | 48                 | $3.94 \times 10^{-14}$      | Atkinson (1991)          |
| 2,3-Dihydrobenzofuran   | C <sub>8</sub> H <sub>8</sub> O               |    | 34                 | $1.15 \times 10^{-13}$      | Atkinson (1991)          |
| cis-3-Hexenyl-1-Acetate | C <sub>8</sub> H <sub>14</sub> O <sub>2</sub> |    | 24                 | $2.46 \times 10^{-13}$      | Atkinson et al. (1995)   |
| Isoprene                | C <sub>5</sub> H <sub>8</sub>                 |   | 38                 | $6.77 \times 10^{-13}$      | Atkinson (1991)          |
| Dimethyl Sulfide        | C <sub>2</sub> H <sub>6</sub> S               |  | 6.5                | $1.09 \times 10^{-12}$      | Atkinson et al. (2004)   |
| 2,5-Dimethylthiophene   | C <sub>6</sub> H <sub>8</sub> S               |  | 4.2                | $2.52 \times 10^{-12}$      | Cabañas et al. (2006)    |
| α-Pinene                | C <sub>10</sub> H <sub>16</sub>               |  | 3.0                | $6.16 \times 10^{-12}$      | Atkinson (1991)          |
| Guaiacol                | C <sub>7</sub> H <sub>8</sub> O <sub>2</sub>  |  | 2.1                | $2.69 \times 10^{-11}$      | Lauraguais et al. (2016) |



Table S2: KinSim mechanism used to calculate concentrations of species associated with irradiation of CAN/HNO<sub>3</sub> mixtures. Rate coefficients (**blue text**, **red text** or **black text**) or absorption cross sections (**teal text**) are given in units of cm<sup>3</sup> molecules<sup>-1</sup> s<sup>-1</sup> (**blue text**), M<sup>-1</sup> s<sup>-1</sup> (**red text**), cm<sup>2</sup> (**teal text**), or s<sup>-1</sup> (**black text**). Condensed-phase reaction rate coefficients were used where possible, and otherwise were obtained from gas-phase reaction rate coefficients. Reaction rate coefficients in parentheses were obtained by applying a 6.022E+020 conversion factor to the other reaction coefficient listed in the same row. Citations of rate coefficient and absorption cross section values that are specifically applicable to mixtures containing [HNO<sub>3</sub>] = 1.0 M, 3.0 M or 6.0 M are colored with **brown**, **violet**, or **orange** text, respectively.

| Reactant 1                                    | Reactant 2        | Product 1                                     | Product 2                    | Product 3 | RateCoeff           | Citation                   |
|-----------------------------------------------|-------------------|-----------------------------------------------|------------------------------|-----------|---------------------|----------------------------|
| Ce <sup>IV</sup> NO <sub>3</sub> <sup>-</sup> | hν <sub>254</sub> | [Ce <sup>III</sup> ...NO <sub>3</sub> ]*      | NO <sub>3</sub>              |           | 2.7E-17             | this work                  |
|                                               |                   |                                               |                              |           | 3.1E-17             | this work                  |
|                                               |                   |                                               |                              |           | 3.1E-17             | this work                  |
| Ce <sup>IV</sup> NO <sub>3</sub> <sup>-</sup> | hν <sub>313</sub> | [Ce <sup>III</sup> ...NO <sub>3</sub> ]*      | NO <sub>3</sub>              |           | 3.1E-17             | this work                  |
|                                               |                   |                                               |                              |           | 3.5E-17             | this work                  |
|                                               |                   |                                               |                              |           | 4.5E-17             | this work                  |
| Ce <sup>IV</sup> NO <sub>3</sub> <sup>-</sup> | hν <sub>369</sub> | [Ce <sup>III</sup> ...NO <sub>3</sub> ]*      | NO <sub>3</sub>              |           | 8.7E-18             | this work                  |
|                                               |                   |                                               |                              |           | 1.2E-17             | this work                  |
|                                               |                   |                                               |                              |           | 2.5E-17             | this work                  |
| Ce <sup>IV</sup> NO <sub>3</sub> <sup>-</sup> | hν <sub>421</sub> | [Ce <sup>III</sup> ...NO <sub>3</sub> ]*      | NO <sub>3</sub>              |           | 1.0E-18             | this work                  |
|                                               |                   |                                               |                              |           | 1.5E-18             | this work                  |
|                                               |                   |                                               |                              |           | 4.4E-18             | this work                  |
| [Ce <sup>III</sup> ...NO <sub>3</sub> ]*      |                   | Ce <sup>IV</sup> NO <sub>3</sub> <sup>-</sup> |                              |           | 5.12E+04            | Martin and Stevens (1978)  |
|                                               |                   |                                               |                              |           | 6.30E+03            | Martin and Stevens (1978)  |
|                                               |                   |                                               |                              |           | 0                   | Martin and Stevens (1978)  |
| [Ce <sup>III</sup> ...NO <sub>3</sub> ]*      |                   | Ce <sup>III</sup>                             | NO <sub>3</sub>              |           | 4.36E+04            | Martin and Stevens (1978)  |
|                                               |                   |                                               |                              |           | 6.76E+04            | Martin and Stevens (1978)  |
|                                               |                   |                                               |                              |           | 7.74E+04            | Martin and Stevens (1978)  |
| Ce <sup>III</sup>                             | NO <sub>3</sub>   | Ce <sup>IV</sup> NO <sub>3</sub> <sup>-</sup> |                              |           | 6.00E+07 (9.96E-14) | Martin and Stevens (1978)  |
|                                               |                   |                                               |                              |           | 1.08E+06 (1.79E-15) | Martin and Stevens (1978)  |
|                                               |                   |                                               |                              |           | 1.78E+06 (2.96E-15) | Martin and Stevens (1978)  |
| NO <sub>3</sub>                               | hν <sub>254</sub> | NO <sub>2</sub>                               | O                            |           | 1.20E-19            | Sander (1986)              |
| NO <sub>3</sub>                               | hν <sub>313</sub> | NO <sub>2</sub>                               | O                            |           | N/A                 | N/A                        |
| NO <sub>3</sub>                               | hν <sub>369</sub> | NO <sub>2</sub>                               | O                            |           | 9.56E-19            | Schott and Davidson (1958) |
| NO <sub>3</sub>                               | hν <sub>421</sub> | NO <sub>2</sub>                               | O                            |           | 8.00E-20            | Wayne et al. (1991)        |
| NO <sub>3</sub>                               | H <sub>2</sub> O  | H <sup>+</sup>                                | NO <sub>3</sub> <sup>-</sup> | OH        | 5.30E+05 (8.80E-16) | Jiang et al. (1992)        |

Table S2 – continued from previous page

| Reactant 1                    | Reactant 2                    | Product 1                     | Product 2                    | Product 3        | RateCoeff            | Citation                     |
|-------------------------------|-------------------------------|-------------------------------|------------------------------|------------------|----------------------|------------------------------|
| NO <sub>3</sub>               | NO                            | 2 NO <sub>2</sub>             |                              |                  | (1.57E+10 ) 2.6E-11  | Atkinson et al. (2004)       |
| NO <sub>3</sub>               | NO <sub>2</sub>               | N <sub>2</sub> O <sub>5</sub> |                              |                  | 1.70E+09 (2.82E-12 ) | Katsumura et al. (1991)      |
| NO <sub>3</sub>               | NO <sub>2</sub> <sup>-</sup>  | NO <sub>3</sub> <sup>-</sup>  | NO <sub>2</sub>              |                  | 1.2E+09 (2.0E-12)    | Daniels (1969)               |
| NO <sub>3</sub>               | NO <sub>3</sub>               | N <sub>2</sub> O <sub>6</sub> |                              |                  | 9.2E+05 (1.53E-15)   | Martin and Stevens (1978)    |
| NO <sub>3</sub>               | H                             | NO <sub>2</sub>               | OH                           |                  | (5.66E+10) 9.4E-11   | Becker et al. (1992)         |
| NO <sub>3</sub>               | O                             | NO <sub>2</sub>               | O <sub>2</sub>               |                  | (6.02E+09) 1.0E-11   | DeMore et al. (1994)         |
| NO <sub>3</sub>               | OH                            | NO <sub>2</sub>               | HO <sub>2</sub>              |                  | (1.20E+10) 2.0E-11   | Atkinson et al. (1994)       |
| NO <sub>3</sub>               | HO <sub>2</sub>               | H <sup>+</sup>                | NO <sub>3</sub> <sup>-</sup> | O <sub>2</sub>   | 3E+09 (4.98E-12)     | Jiang et al. (1992)          |
| NO <sub>3</sub>               | H <sub>2</sub> O <sub>2</sub> | H <sup>+</sup>                | NO <sub>3</sub> <sup>-</sup> | HO <sub>2</sub>  | 7.1E+06 (1.7E-14)    | Herrmann et al. (1994)       |
| NO <sub>3</sub>               | HNO <sub>2</sub>              | H <sup>+</sup>                | NO <sub>3</sub> <sup>-</sup> | NO <sub>2</sub>  | 8.0E+06 (1.3E-14)    | Katsumura et al. (1991)      |
| NO <sub>2</sub>               | hν <sub>254</sub>             | NO                            | O                            |                  | 1.1E-20              | Sander et al. (2011)         |
| NO <sub>2</sub>               | hν <sub>313</sub>             | NO                            | O                            |                  | 2.2E-19              | Sander et al. (2011)         |
| NO <sub>2</sub>               | hν <sub>369</sub>             | NO                            | O                            |                  | 5.6E-19              | Sander et al. (2011)         |
| NO <sub>2</sub>               | NO                            | N <sub>2</sub> O <sub>3</sub> |                              |                  | 1.1E+09 (1.8E-12)    | Grätzel et al. (1970)        |
| NO <sub>2</sub>               | NO <sub>2</sub>               | N <sub>2</sub> O <sub>4</sub> |                              |                  | 4.7E+08 (7.8E-13)    | Poskrebyshv et al. (2001)    |
| NO <sub>2</sub>               | O                             | NO                            | O <sub>2</sub>               |                  | (6.02E+09) 1.0E-11   | Atkinson et al. (2004)       |
| NO <sub>2</sub>               | O                             | NO <sub>3</sub>               |                              |                  | (1.39E+10 ) 2.3E-11  | Atkinson et al. (2004)       |
| NO <sub>2</sub>               | H                             | HNO <sub>2</sub>              |                              |                  | 1E+10 (1.7E-11)      | Loegager and Sehested (1993) |
| NO <sub>2</sub>               | OH                            | H <sup>+</sup>                | NO <sub>3</sub> <sup>-</sup> |                  | 4.5E+09 (2.0E-11)    | Loegager and Sehested (1993) |
| NO <sub>2</sub>               | HO <sub>2</sub>               | HNO <sub>4</sub>              |                              |                  | 1.8E+09 (3.0E-12)    | Loegager and Sehested (1993) |
| NO                            | O                             | NO <sub>2</sub>               |                              |                  | (1.81E+10 ) 3.0E-11  | Atkinson et al. (2004)       |
| NO                            | OH                            | HNO <sub>2</sub>              |                              |                  | 2E+10 (3.3E-11)      | Strehlow and Wagner (1982)   |
| NO                            | HO <sub>2</sub>               | H <sup>+</sup>                | NO <sub>3</sub> <sup>-</sup> |                  | 3.2E+09 (5.3E-12)    | Goldstein and Czapski (1995) |
| N <sub>2</sub> O <sub>3</sub> | hν <sub>313</sub>             | NO                            | NO <sub>2</sub>              |                  | 9.4E-19              | Stockwell and Calvert (1978) |
| N <sub>2</sub> O <sub>3</sub> | hν <sub>369</sub>             | NO                            | NO <sub>2</sub>              |                  | 2.7E-19              | Stockwell and Calvert (1978) |
| N <sub>2</sub> O <sub>3</sub> |                               | NO                            | NO <sub>2</sub>              |                  | 3.6E+08              | Atkinson et al. (2004)       |
| N <sub>2</sub> O <sub>3</sub> | H <sub>2</sub> O              | 2 HNO <sub>2</sub>            |                              |                  | 2.0E+08 (3.3E-13)    | Park and Lee (1988)          |
| N <sub>2</sub> O <sub>4</sub> | hν <sub>254</sub>             | 2 NO <sub>2</sub>             |                              |                  | 6.5E-19              | Sander et al. (2011)         |
| N <sub>2</sub> O <sub>4</sub> | hν <sub>313</sub>             | 2 NO <sub>2</sub>             |                              |                  | 2.5E-19              | Sander et al. (2011)         |
| N <sub>2</sub> O <sub>4</sub> | hν <sub>369</sub>             | 2 NO <sub>2</sub>             |                              |                  | 1.3E-19              | Sander et al. (2011)         |
| N <sub>2</sub> O <sub>4</sub> |                               | 2 NO <sub>2</sub>             |                              |                  | 6800                 | Poskrebyshv et al. (2001)    |
| N <sub>2</sub> O <sub>4</sub> | H <sub>2</sub> O              | H <sup>+</sup>                | NO <sub>3</sub> <sup>-</sup> | HNO <sub>2</sub> | 1.5E+08 (2.49E-13)   | Park and Lee (1988)          |
| N <sub>2</sub> O <sub>5</sub> | hν <sub>254</sub>             | NO <sub>2</sub>               | NO <sub>3</sub>              |                  | 3.2E-19              | Sander et al. (2011)         |

Table S2 – continued from previous page

| Reactant 1                    | Reactant 2                    | Product 1                     | Product 2                      | Product 3 | RateCoeff           | Citation                     |
|-------------------------------|-------------------------------|-------------------------------|--------------------------------|-----------|---------------------|------------------------------|
| N <sub>2</sub> O <sub>5</sub> | hν <sub>313</sub>             | NO <sub>2</sub>               | NO <sub>3</sub>                |           | 1.6E-20             | Sander et al. (2011)         |
| N <sub>2</sub> O <sub>5</sub> | hν <sub>369</sub>             | NO <sub>2</sub>               | NO <sub>3</sub>                |           | 7.2E-22             | Sander et al. (2011)         |
| N <sub>2</sub> O <sub>5</sub> | hν <sub>421</sub>             | NO <sub>2</sub>               | NO <sub>3</sub>                |           | 8.0E-23             | Sander et al. (2011)         |
| N <sub>2</sub> O <sub>5</sub> |                               | NO <sub>2</sub>               | NO <sub>3</sub>                |           | 0.06                | Atkinson et al. (2004)       |
| N <sub>2</sub> O <sub>5</sub> | H <sub>2</sub> O              | 2 H <sup>+</sup>              | 2 NO <sub>3</sub> <sup>-</sup> |           | (7.8) 1.3E-20       | Morris and Niki (1973)       |
| HNO <sub>2</sub>              | hν <sub>254</sub>             | NO                            | OH                             |           | 1.4E-19             | Sander et al. (2011)         |
| HNO <sub>2</sub>              | hν <sub>313</sub>             | NO                            | OH                             |           | 2.2E-20             | Sander et al. (2011)         |
| HNO <sub>2</sub>              | hν <sub>369</sub>             | NO                            | OH                             |           | 3.1E-19             | Sander et al. (2011)         |
| HNO <sub>2</sub>              | hν <sub>421</sub>             | NO                            | OH                             |           | 2.4E-21             | Sander et al. (2011)         |
| HNO <sub>2</sub>              | H                             | NO                            | H <sub>2</sub> O               |           | 4.5E+08 (7.5E-13)   | Halpern and Rabani (1966)    |
| HNO <sub>2</sub>              | OH                            | NO <sub>2</sub>               | H <sub>2</sub> O               |           | (3.61E+09) 6.0E-12  | Atkinson et al. (2004)       |
| HNO <sub>3</sub>              | hν <sub>254</sub>             | NO <sub>2</sub>               | OH                             |           | 2.0E-20             | Sander et al. (2011)         |
| HNO <sub>3</sub>              | hν <sub>313</sub>             | NO <sub>2</sub>               | OH                             |           | 6.3E-22             | Sander et al. (2011)         |
| HNO <sub>3</sub>              | hν <sub>369</sub>             | NO <sub>2</sub>               | OH                             |           | 4.2E-24             | Sander et al. (2011)         |
| HNO <sub>3</sub>              | OH                            | NO <sub>3</sub>               | H <sub>2</sub> O               |           | 5.3E+07 (8.8E-14)   | Jiang et al. (1992)          |
| HNO <sub>4</sub>              | hν <sub>254</sub>             | NO <sub>2</sub>               | HO <sub>2</sub>                |           | 3.5E-19             | Sander et al. (2011)         |
| HNO <sub>4</sub>              | hν <sub>313</sub>             | NO <sub>2</sub>               | HO <sub>2</sub>                |           | 4.7E-21             | Sander et al. (2011)         |
| HNO <sub>4</sub>              | hν <sub>369</sub>             | NO <sub>2</sub>               | HO <sub>2</sub>                |           | 1.7E-22             | Sander et al. (2011)         |
| HNO <sub>4</sub>              |                               | NO <sub>2</sub>               | HO <sub>2</sub>                |           | 4.6E-03             | Lammel et al. (1990)         |
| HNO <sub>4</sub>              |                               | HNO <sub>2</sub>              | O <sub>2</sub>                 |           | 7E-04               | Loegager and Sehested (1993) |
| HNO <sub>4</sub>              | OH                            |                               |                                |           | (2.83E+09) 4.70E-12 | Atkinson et al. (2004)       |
| H                             | O <sub>2</sub>                | HO <sub>2</sub>               |                                |           | 1.0E+10 (1.7E-11)   | Elliot et al. (1990)         |
| H                             | O <sub>2</sub>                | H <sub>2</sub> O <sub>2</sub> |                                |           | 2.0E+10 (3.3E-11)   | Feng et al. (1970)           |
| OH                            | O                             | O <sub>2</sub>                | H                              |           | (2.0E+10) 3.3E-11   | DeMore et al. (1997)         |
| OH                            | OH                            | H <sub>2</sub> O <sub>2</sub> |                                |           | 4.2E+09 (7.0E-12)   | Elliot et al. (1990)         |
| OH                            | HO <sub>2</sub>               | O <sub>2</sub>                | H <sub>2</sub> O               |           | 1.0E+10 (1.7E-11)   | Elliot and Buxton (1992)     |
| OH                            | HO <sub>2</sub>               | H <sub>2</sub> O <sub>3</sub> |                                |           | (2.14E+09) 3.55E-12 | Badenes et al. (2017)        |
| OH                            | H <sub>2</sub> O <sub>2</sub> | HO <sub>2</sub>               | H <sub>2</sub> O               |           | (1.0E+09) 1.7E-12   | Atkinson et al. (2004)       |
| H <sub>2</sub> O <sub>2</sub> | hν <sub>254</sub>             | 2OH                           |                                |           | 6.7E-20             | Sander et al. (2011)         |
| H <sub>2</sub> O <sub>2</sub> | hν <sub>313</sub>             | 2OH                           |                                |           | 3.4E-21             | Sander et al. (2011)         |
| H <sub>2</sub> O <sub>2</sub> | hν <sub>369</sub>             | 2OH                           |                                |           | 7.2E-23             | Kahan et al. (2012)          |
| H <sub>2</sub> O <sub>2</sub> | hν <sub>421</sub>             | 2OH                           |                                |           | 9.2E-24             | Kahan et al. (2012)          |
| H <sub>2</sub> O <sub>2</sub> | H                             | H <sub>2</sub> O              | OH                             |           | 3.6E+07 (6.0E-14)   | Mezyk and Bartels (1995)     |

Table S2 – continued from previous page

| Reactant 1                    | Reactant 2     | Product 1        | Product 2       | Product 3 | RateCoeff         | Citation                  |
|-------------------------------|----------------|------------------|-----------------|-----------|-------------------|---------------------------|
| H <sub>2</sub> O <sub>2</sub> | O              | HO <sub>2</sub>  | OH              |           | 1.6E+09 (2.7E-12) | Sauer et al. (1984)       |
| NO <sub>3</sub> <sup>-</sup>  | H              | H <sub>2</sub> O | NO <sub>2</sub> |           | 1.0E+07 (1.7E-14) | Jiang et al. (1992)       |
| NO <sub>3</sub> <sup>-</sup>  | H <sup>+</sup> | HNO <sub>3</sub> |                 |           | 6.0E+08 (1.0E-12) | Poskrebyshv et al. (2001) |

**Table S3.** Room-temperature bimolecular rate coefficients ( $k_{298}$ ) used to calculate fates of alkyl and acyl organic peroxy radicals (alkyl-RO<sub>2</sub>, acyl-RO<sub>2</sub>) formed from VOC + NO<sub>3</sub> reactions as a function of CAN irradiation conditions summarized in Fig. 6. Kinetic data is adapted from Orlando and Tyndall (2012). Rate coefficients are given in units of cm<sup>3</sup> molecule<sup>-1</sup> s<sup>-1</sup>.

| Reactant 1            | Reactant 2      | $k_{298}$             |
|-----------------------|-----------------|-----------------------|
| alkyl-RO <sub>2</sub> | HO <sub>2</sub> | $7.7 \times 10^{-12}$ |
| acyl-RO <sub>2</sub>  | HO <sub>2</sub> | $1.4 \times 10^{-11}$ |
| alkyl-RO <sub>2</sub> | NO <sub>3</sub> | $2.4 \times 10^{-12}$ |
| acyl-RO <sub>2</sub>  | NO <sub>3</sub> | $3.2 \times 10^{-12}$ |
| acyl-RO <sub>2</sub>  | NO <sub>2</sub> | $1.1 \times 10^{-11}$ |

## References

- Abida, O. and Osthoff, H. D.: On the pH dependence of photo-induced volatilization of nitrogen oxides from frozen solutions containing nitrate, *Geophysical Research Letters*, 38, <https://doi.org/https://doi.org/10.1029/2011GL048517>, 2011.
- Atkinson, R.: Kinetics and Mechanisms of the Gas-Phase Reactions of the NO<sub>3</sub> Radical with Organic Compounds, *Journal of Physical and Chemical Reference Data*, 20, 459–507, <https://doi.org/http://dx.doi.org/10.1063/1.555887>, 1991.
- Atkinson, R., Tuazon, E. C., Bridier, I., and Arey, J.: Reactions of NO<sub>3</sub>-naphthalene adducts with O<sub>2</sub> and NO<sub>2</sub>, *Int. J. Chem. Kinet.*, 26, 605–614, <https://doi.org/10.1002/kin.550260603>, 1994.
- Atkinson, R., Arey, J., Aschmann, S. M., Corchnoy, S. B., and Shu, Y.: Rate constants for the gas-phase reactions of cis-3-Hexen-1-ol, cis-3-Hexenylacetate, trans-2-Hexenal, and Linalool with OH and NO<sub>3</sub> radicals and O<sub>3</sub> at 296 ± 2 K, and OH radical formation yields from the O<sub>3</sub> reactions, *International Journal of Chemical Kinetics*, 27, 941–955, <https://doi.org/https://doi.org/10.1002/kin.550271002>, 1995.
- Atkinson, R., Baulch, D. L., Cox, R. A., Crowley, J. N., Hampson, R. F., Hynes, R. G., Jenkin, M. E., Rossi, M. J., and Troe, J.: Evaluated kinetic and photochemical data for atmospheric chemistry: Volume I - gas phase reactions of O<sub>x</sub>, HO<sub>x</sub>, NO<sub>x</sub> and SO<sub>x</sub> species, *Atmospheric Chemistry and Physics*, 4, 1461–1738, <https://doi.org/10.5194/acp-4-1461-2004>, 2004.
- Badenes, M. P., Tucceri, M. E., and Cobos, C. J.: Role of the Recombination Channel in the Reaction between the HO and HO<sub>2</sub> Radicals, *J. Phys. Chem. A*, 121, 440–447, <https://doi.org/10.1021/acs.jpca.6b10427>, 2017.
- Becke, A. D.: Density-functional thermochemistry. III. The role of exact exchange, *The Journal of Chemical Physics*, 98, 5648–5652, <https://doi.org/10.1063/1.464913>, 1993.
- Becker, E., Rahman, M. M., and Schindler, R. N.: Determination of the Rate Constants for the Gas Phase Reactions of NO<sub>3</sub> with H, OH and HO<sub>2</sub> Radicals at 298 K, *Berichte der Bunsengesellschaft für physikalische Chemie*, 96, 776–783, <https://doi.org/https://doi.org/10.1002/bbpc.19920960608>, 1992.
- Cabañas, B., Baeza, M., Martín, P., Salgado, S., Villanueva, F., Monedero, E., and Díaz De Mera, Y.: Reaction of the NO<sub>3</sub> radical with some thiophenes: Kinetic study and a correlation between rate constant and EHOMO, *International Journal of Chemical Kinetics*, 38, 570–576, <https://doi.org/https://doi.org/10.1002/kin.20187>, 2006.
- Cantrell, C. A., Davidson, J. A., Shetter, R. E., Anderson, B. A., and Calvert, J. G.: Reactions of nitrate radical and nitrogen oxide (N<sub>2</sub>O<sub>5</sub>) with molecular species of possible atmospheric interest, *The Journal of Physical Chemistry*, 91, 6017–6021, <https://doi.org/10.1021/j100307a040>, 1987.

- Daniels, M.: Radiation chemistry of the aqueous nitrate system. III. Pulse electron radiolysis of concentrated sodium nitrate solutions, *J. Phys. Chem.*, 73, 3710–3717, <https://doi.org/10.1021/j100845a027>, 1969.
- D'Anna, B., Andresen, Ø., Gefen, Z., and Nielsen, C. J.: Kinetic study of OH and NO<sub>3</sub> radical reactions with 14 aliphatic aldehydes, *Phys. Chem. Chem. Phys.*, 3, 3057–3063, <https://doi.org/10.1039/B103623H>, 2001.
- DeMore, W., Sander, S., Golden, D., Hampson, R., Kurylo, M., Howard, C., Ravishankara, A., Kolb, C., and Molina, M.: Chemical Kinetic and Photochemical Data for Use in Stratospheric Modeling: Evaluation No. 11 of the NASA Panel for Data Evaluation, JPL Publication 94-26, 1994.
- DeMore, W. B., Sander, S. P., Golden, D. M., Hampson, R. F., Kurylo, M. J., Howard, C. J., Ravishankara, A. R., Kolb, C. E., and Molina, M. J.: Chemical kinetics and photochemical data for use in stratospheric modeling. Evaluation number 12, JPL Publication 97-4, 1997.
- Dörich, R., Eger, P., Lelieveld, J., and Crowley, J. N.: Iodide CIMS and *m/z* 62: the detection of HNO<sub>3</sub> as NO<sub>3</sub><sup>−</sup> in the presence of PAN, peroxyacetic acid and ozone, *Atmospheric Measurement Techniques*, 14, 5319–5332, <https://doi.org/10.5194/amt-14-5319-2021>, 2021.
- Dunning, Thom H., J.: Gaussian basis sets for use in correlated molecular calculations. I. The atoms boron through neon and hydrogen, *The Journal of Chemical Physics*, 90, 1007–1023, <https://doi.org/10.1063/1.456153>, 1989.
- Elliot, A. J. and Buxton, G. V.: Temperature dependence of the reactions OH + O and OH + HO<sub>2</sub> in water up to 200 °C, *J. Chem. Soc., Faraday Trans.*, 88, 2465–2470, <https://doi.org/10.1039/FT9928802465>, 1992.
- Elliot, A. J., McCracken, D. R., Buxton, G. V., and Wood, N. D.: Estimation of rate constants for near-diffusion-controlled reactions in water at high temperatures, *J. Chem. Soc., Faraday Trans.*, 86, 1539–1547, <https://doi.org/10.1039/FT9908601539>, 1990.
- Epifanovsky, E., Gilbert, A. T. B., Feng, X., Lee, J., Mao, Y., Mardirossian, N., Pokhilko, P., White, A. F., Coons, M. P., Dempwolff, A. L., Gan, Z., Hait, D., Horn, P. R., Jacobson, L. D., Kaliman, I., Kussmann, J., Lange, A. W., Lao, K. U., Levine, D. S., Liu, J., McKenzie, S. C., Morrison, A. F., Nanda, K. D., Plasser, F., Rehn, D. R., Vidal, M. L., You, Z.-Q., Zhu, Y., Alam, B., Albrecht, B. J., Aldossary, A., Alguire, E., Andersen, J. H., Athavale, V., Barton, D., Begam, K., Behn, A., Bellonzi, N., Bernard, Y. A., Berquist, E. J., Burton, H. G. A., Carreras, A., Carter-Fenk, K., Chakraborty, R., Chien, A. D., Closser, K. D., Cofer-Shabica, V., Dasgupta, S., de Wergifosse, M., Deng, J., Didenhofen, M., Do, H., Ehlert, S., Fang, P.-T., Fatehi, S., Feng, Q., Friedhoff, T., Gayvert, J., Ge, Q., Gidofalvi, G., Goldey, M., Gomes, J., González-Espinoza, C. E., Gulania, S., Gunina, A. O., Hanson-Heine, M. W. D., Harbach, P. H. P., Hauser, A., Herbst, M. F., Hernández Vera, M., Hodecker, M., Holden, Z. C., Houck, S., Huang, X., Hui, K., Huynh, B. C., Ivanov, M., Jász, A., Ji, H., Jiang, H., Kaduk, B., Kähler, S., Khistyayev, K., Kim, J., Kis, G., Klunzinger, P., Koczor-Benda, Z., Koh, J. H., Kosenkov, D., Koulias, L., Kowalczyk, T., Krauter, C. M., Kue, K., Kunitsa, A., Kus, T., Ladjánszki, I., Landau, A., Lawler, K. V., Lefrancois, D., Lehtola, S., Li, R. R., Li, Y.-P., Liang, J., Liebenthal, M., Lin, H.-H., Lin, Y.-S., Liu, F., Liu, K.-Y., Loipersberger, M., Luenser, A., Manjanath, A., Manohar, P., Mansoor, E., Manzer, S. F., Mao, S.-P., Marenich, A. V., Markovich, T., Mason, S., Maurer, S. A., McLaughlin, P. F., Menger, M. F. S. J., Mewes, J.-M., Mewes, S. A., Morgante, P., Mullinax, J. W., Oosterbaan, K. J., Paran, G., Paul, A. C., Paul, S. K., Pavošević, F., Pei, Z., Prager, S., Proynov, E. I., Rák, A., Ramos-Cordoba, E., Rana, B., Rask, A. E., Rettig, A., Richard, R. M., Rob, F., Rossomme, E., Scheele, T., Scheurer, M., Schneider, M., Sergueev, N., Sharada, S. M., Skomorowski, W., Small, D. W., Stein, C. J., Su, Y.-C., Sundstrom, E. J., Tao, Z., Thirman, J., Tornai, G. J., Tsuchimochi, T., Tubman, N. M., Veccham, S. P., Vydrov, O., Wenzel, J., Witte, J., Yamada, A., Yao, K., Yeganeh, S., Yost, S. R., Zech, A., Zhang, I. Y., Zhang, X., Zhang, Y., Zuev, D., Aspuru-Guzik, A., Bell, A. T., Besley, N. A., Bravaya, K. B., Brooks, B. R., Casanova, D., Chai, J.-D., Coriani, S., Cramer, C. J., Cserey, G., DePrince, A. E. r., DiStasio, R. A. J., Dreuw, A., Dunietz, B. D., Furlani, T. R., Goddard, W. A. r., Hammes-Schiffer, S., Head-Gordon, T., Hehre, W. J., Hsu, C.-P., Jagau, T.-C., Jung, Y., Klamt, A., Kong, J., Lambrecht, D. S., Liang, W., Mayhall, N. J., McCurdy, C. W., Neaton, J. B., Ochsenfeld, C., Parkhill, J. A., Peverati, R., Rassolov, V. A., Shao, Y., Slipchenko, L. V., Stauch, T., Steele, R. P., Subotnik, J. E., Thom, A. J. W., Tkatchenko, A., Truhlar, D. G.,

- 105 Van Voorhis, T., Wesolowski, T. A., Whaley, K. B., Woodcock, H. L. r., Zimmerman, P. M., Faraji, S., Gill, P. M. W., Head-Gordon, M., Herbert, J. M., and Krylov, A. I.: Software for the frontiers of quantum chemistry: An overview of developments in the Q-Chem 5 package., *The Journal of chemical physics*, 155, 084 801, 2021.
- Feng, P. Y., Brynjolfsson, A., Halliday, J. W., and Jarrett, R. D.: High-intensity radiolysis of aqueous ferrous sulfate-cupric sulfate-sulfuric acid solutions, *J. Phys. Chem.*, 74, 1221–1227, <https://doi.org/10.1021/j100701a011>, 1970.
- 110 Glendening, E. D. and Halpern, A. M.: Ab initio calculations of nitrogen oxide reactions: Formation of N<sub>2</sub>O<sub>2</sub>, N<sub>2</sub>O<sub>3</sub>, N<sub>2</sub>O<sub>4</sub>, N<sub>2</sub>O<sub>5</sub>, and N<sub>4</sub>O<sub>2</sub> from NO, NO<sub>2</sub>, NO<sub>3</sub>, and N<sub>2</sub>O, *The Journal of Chemical Physics*, 127, <https://doi.org/10.1063/1.2777145>, 164307, 2007.
- Goldstein, S. and Czapski, G.: The reaction of NO with O<sub>2</sub><sup>-</sup> and HO<sub>2</sub><sup>-</sup>: a pulse radiolysis study, *Free radical biology & medicine*, 19, 505–10, 1995.
- Grätzel, M., Taniguchi, S., and Henglein, A.: Pulsradiolytische Untersuchung kurzlebiger Zwischenprodukte der  
115 NO-Reduktion in wäßriger Lösung, *Berichte der Bunsengesellschaft für physikalische Chemie*, 74, 1003–1010, <https://doi.org/https://doi.org/10.1002/bbpc.19700741012>, 1970.
- Halpern, J. and Rabani, J.: Reactivity of Hydrogen Atoms toward Some Cobalt(III) Complexes in Aqueous Solutions<sup>1</sup>, *J. Am. Chem. Soc.*, 88, 699–704, <https://doi.org/10.1021/ja00956a015>, 1966.
- Hariharan, P. C. and Pople, J. A.: The influence of polarization functions on molecular orbital hydrogenation energies, *Theoretica chimica*  
120 *acta*, 28, 213–222, <https://doi.org/10.1007/BF00533485>, 1973.
- Herrmann, H., Exner, M., and Zellner, R.: Reactivity trends in reactions of the nitrate radical (NO<sub>3</sub>) with inorganic and organic cloudwater constituents, *Geochimica et Cosmochimica Acta*, 58, 3239 – 3244, [https://doi.org/https://doi.org/10.1016/0016-7037\(94\)90051-5](https://doi.org/https://doi.org/10.1016/0016-7037(94)90051-5), 1994.
- Huey, L. G., Hanson, D. R., and Howard, C. J.: Reactions of SF<sub>6</sub>- and I- with Atmospheric Trace Gases, *J. Phys. Chem.*, 99, 5001–5008, <https://doi.org/10.1021/j100014a021>, 1995.
- 125 Jeziorski, B. and Monkhorst, H. J.: Coupled-cluster method for multideterminantal reference states, *Phys. Rev. A*, 24, 1668–1681, <https://doi.org/10.1103/PhysRevA.24.1668>, 1981.
- Jiang, P. Y., Katsumura, Y., Ishigure, K., and Yoshida, Y.: Reduction potential of the nitrate radical in aqueous solution, *Inorg. Chem.*, 31, 5135–5136, <https://doi.org/10.1021/ic00050a038>, 1992.
- Jitariu, L. C. and Hirst, D. M.: Theoretical investigation of the N<sub>2</sub>O<sub>5</sub>⇌NO<sub>2</sub>+NO<sub>3</sub> equilibrium by density functional theory and ab initio  
130 calculations, *Phys. Chem. Chem. Phys.*, 2, 847–852, <https://doi.org/10.1039/A906864C>, 2000.
- Kahan, T. F., Washenfelder, R. A., Vaida, V., and Brown, S. S.: Cavity-Enhanced Measurements of Hydrogen Peroxide Absorption Cross Sections from 353 to 410 nm, *J. Phys. Chem. A*, 116, 5941–5947, <https://doi.org/10.1021/jp2104616>, 2012.
- Katsumura, Y., Jiang, P. Y., Nagaishi, R., Oishi, T., Ishigure, K., and Yoshida, Y.: Pulse radiolysis study of aqueous nitric acid solutions: formation mechanism, yield, and reactivity of NO<sub>3</sub> radical, *J. Phys. Chem.*, 95, 4435–4439, <https://doi.org/10.1021/j100164a050>, 1991.
- 135 Lammel, G., Perner, D., and Warneck, P.: Decomposition of pernitric acid in aqueous solution, *J. Phys. Chem.*, 94, 6141–6144, <https://doi.org/10.1021/j100378a091>, 1990.
- Lauraguais, A., El Zein, A., Coeur, C., Obeid, E., Cassez, A., Rayez, M.-T., and Rayez, J.-C.: Kinetic Study of the Gas-Phase Reactions of Nitrate Radicals with Methoxyphenol Compounds: Experimental and Theoretical Approaches, *J. Phys. Chem. A*, 120, 2691–2699, <https://doi.org/10.1021/acs.jpca.6b02729>, 2016.
- 140 Loegager, T. and Sehested, K.: Formation and decay of peroxyxynitrous acid: a pulse radiolysis study, *J. Phys. Chem.*, 97, 6664–6669, <https://doi.org/10.1021/j100127a016>, 1993.

- Martin, T. W. and Stevens, M. V.: Studies Using a Combination of Flash Photolysis and Pulsed Magnetic Induction: Application to the NO<sub>3</sub> Radical in Aqueous Acid Solution at 25°C, in: 12th Informal Conference on Photochemistry, National Bureau of Standards Special Publication 526, 1978.
- 145 Mezyk, S. P. and Bartels, D. M.: Direct EPR measurement of Arrhenius parameters for the reactions of H· atoms with H<sub>2</sub>O<sub>2</sub> and D· atoms with D<sub>2</sub>O<sub>2</sub> in aqueous solution, *J. Chem. Soc., Faraday Trans.*, 91, 3127–3132, <https://doi.org/10.1039/FT9959103127>, 1995.
- Morris, E. D. J. and Niki, H.: Reaction of dinitrogen pentoxide with water, *J. Phys. Chem.*, 77, 1929–1932, <https://doi.org/10.1021/j100635a001>, 1973.
- Orlando, J. J. and Tyndall, G. S.: Laboratory studies of organic peroxy radical chemistry: an overview with emphasis on recent issues of atmospheric significance, *Chem. Soc. Rev.*, 41, 6294–6317, <https://doi.org/10.1039/C2CS35166H>, 2012.
- 150 Park, J. Y. and Lee, Y. N.: Solubility and decomposition kinetics of nitrous acid in aqueous solution, *J. Phys. Chem.*, 92, 6294–6302, <https://doi.org/10.1021/j100333a025>, 1988.
- Poskrebyshev, G. A., Neta, P., and Huie, R. E.: Equilibrium constant of the reaction  $\cdot\text{OH} + \text{HNO}_3 \rightleftharpoons \text{H}_2\text{O} + \text{NO}_3$  in aqueous solution, *Journal of Geophysical Research: Atmospheres*, 106, 4995–5004, <https://doi.org/10.1029/2000JD900702>, 2001.
- 155 Sander, S., Abbatt, J. P. D., Barker, J. R., Burkholder, J. B., Friedl, R. R., Golden, D. M., Huie, R. E., Kolb, C. E., Kurylo, M. J., Moortgat, G. K., Orkin, V. L., and Wine, P. H.: Chemical Kinetics and Photochemical Data for Use in Atmospheric Studies, Evaluation Number 17, JPL Publication 10-6, 2011.
- Sander, S. P.: Temperature dependence of the nitrogen trioxide absorption spectrum, *J. Phys. Chem.*, 90, 4135–4142, 1986.
- Sauer, M. C. J., Brown, W. G., and Hart, E. J.: Oxygen(3P) atom formation by the photolysis of hydrogen peroxide in alkaline aqueous solutions, *J. Phys. Chem.*, 88, 1398–1400, <https://doi.org/10.1021/j150651a033>, 1984.
- 160 Schott, G. and Davidson, N.: Shock Waves in Chemical Kinetics: The Decomposition of N<sub>2</sub>O<sub>5</sub> at High Temperatures<sup>1</sup>, *J. Am. Chem. Soc.*, 80, 1841–1853, <https://doi.org/10.1021/ja01541a019>, 1958.
- Stockwell, W. R. and Calvert, J. G.: The near ultraviolet absorption spectrum of gaseous HONO and N<sub>2</sub>O<sub>3</sub>, *Journal of Photochemistry*, 8, 193–203, [https://doi.org/10.1016/0047-2670\(78\)80019-7](https://doi.org/10.1016/0047-2670(78)80019-7), 1978.
- 165 Strehlow, H. and Wagner, I.: Flash Photolysis in Aqueous Nitrite Solutions, *Zeitschrift für Physikalische Chemie*, 132, 151–160, <https://doi.org/10.1524/zpch.1982.132.2.151>, 1982.
- Veres, P. R., Roberts, J. M., Wild, R. J., Edwards, P. M., Brown, S. S., Bates, T. S., Quinn, P. K., Johnson, J. E., Zamora, R. J., and de Gouw, J.: Peroxynitric acid (HO<sub>2</sub>NO<sub>2</sub>) measurements during the UBWOS 2013 and 2014 studies using iodide ion chemical ionization mass spectrometry, *Atmospheric Chemistry and Physics*, 15, 8101–8114, <https://doi.org/10.5194/acp-15-8101-2015>, 2015.
- 170 Wayne, R., Barnes, I., Biggs, P., Burrows, J., Canosa-Mas, C., Hjorth, J., Le Bras, G., Moortgat, G., Perner, D., Poulet, G., Restelli, G., and Sidebottom, H.: The nitrate radical: Physics, chemistry, and the atmosphere, *Atmospheric Environment. Part A. General Topics*, 25, 1–203, [https://doi.org/10.1016/0960-1686\(91\)90192-A](https://doi.org/10.1016/0960-1686(91)90192-A), the nitrate radical: Physics, Chemistry, and the Atmosphere, 1991.
